# Supplementary material
Source: ML conference proceedings conference paper supplement (https://openreview.net/forum?id=KAzku0Uyh1)
Supplement: supplementary_material [file attachment]

## A Data Augmentation Loop

### A.1 Pseudo Code

---

#### Algorithm 1 DATA AUGMENTATION LOOP

---

**Require:** Human data  $D = (G, a^W)$ , training set  $D_t \in D$ , high-level planner  $\pi^H$ , low-level controller  $\pi^L$ , augmentation iteration  $L$ , data augment function  $L_{aug}()$ , wrist pose trajectories  $G_t = (g_t, g_{t+1}, \dots, g_{t+T-1})$ , goal trajectory of the object and its geometric features  $a_t^W = (a_t^W, a_{t+1}^W, \dots, a_{t+T-1}^W)$ .

- 1: Initialize  $\pi^H, \pi^L, D_t = \{\}$ .
- 2: **for** iteration  $m = 0, 1, \dots, L$  **do**
- 3:   **while** until convergence of  $\pi^H$  **do**
- 4:     Generate augmented data  $L_{aug}(D)$
- 5:     Append into training set  $D_t \leftarrow D_t + L_{aug}(D)$
- 6:     Train  $\pi^H$  on  $D_t$
- 7:   **end while**
- 8:   **while** until convergence of  $\pi^L$  **do**
- 9:     Train  $\pi^L$  on  $(\pi^H(G), G)$
- 10:   **end while**
- 11:   Rollout success trajectories  $D_s^t = (a_t^W, G_t)$  with  $\pi^L$
- 12:   Append into human data  $D \leftarrow D + D_s^t$
- 13: **end for**

---

### A.2 Detail of the Data Augmentation Loop

Below are the details for each augmentation. The unit of length is centimeters and the unit of angle is degrees.

- Random the object’s mesh scales with a small scale:
  - The scale of the width of the manipulated object ranges from 0.9 to 1.1.
  - The scale of the length of the manipulated object ranges from 0.9 to 1.1.
  - The scale of the height of the manipulated object ranges from 0.9 to 1.1.
- Random the object’s initial pose with a small scale:
  - The x-coordinate of the manipulated object ranges from -0.02 to 0.02.
  - The y-coordinate of the manipulated object ranges from -0.02 to 0.02.
  - The manipulated object’s z-axis Euler degree ranges from 0 to 30.
- Modify the goal trajectories of the object with waypoint interpolation:
  - The x-coordinate of the goal trajectories position is added by ranges from -0.02 to 0.02.
  - The y-coordinate of the goal trajectories position is added by ranges from -0.02 to 0.02.
  - The z-coordinate of the goal trajectories position is added by ranges from -0.02 to 0.02.

## B Detail Implementation of RL in Simulation

### B.1 Observation Space

Table.5 gives the specific information of the observation space.

### B.2 Reward Design

Denote the  $\hat{g}_i^R$ ,  $\hat{g}_i^T$  and  $\hat{g}_i^J$  is the current 3D translation, 3D rotation and joint angle of the object respectively, the desired object 3D rotation  $g_i^R$ , the desired object 3D translation  $g_i^T$ , and the desired

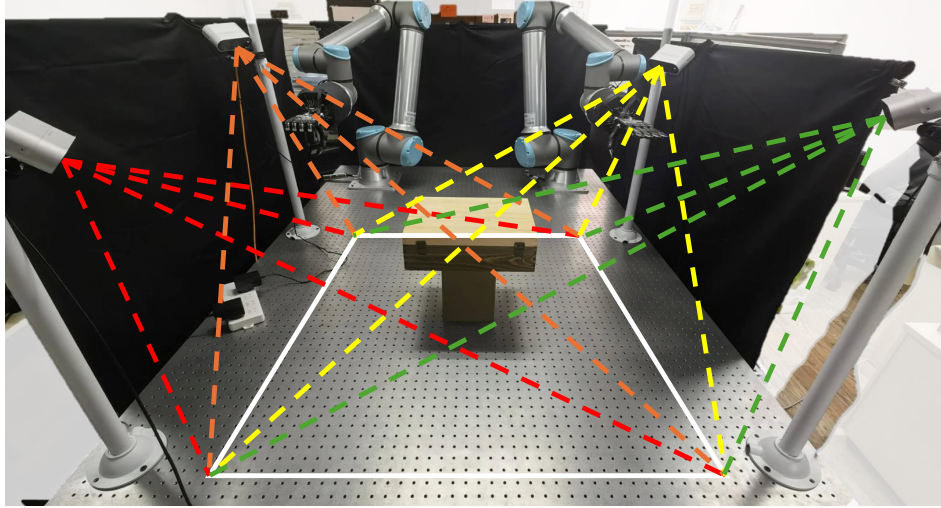

Figure 6: Setup of the cameras.

| Index     | Description                                                                                            |
|-----------|--------------------------------------------------------------------------------------------------------|
| 0 - 60    | right arm-hand dof position, velocity                                                                  |
| 60 - 120  | left arm-hand dof position, velocity                                                                   |
| 120 - 133 | right hand end-effector position, velocity, linear velocity, angle velocity                            |
| 133 - 146 | left hand end-effector position, velocity, linear velocity, angle velocity                             |
| 146 - 159 | object base position, rotation, linear velocity, angle velocity                                        |
| 159 - 172 | articulated object top part position, rotation, linear velocity, angle velocity                        |
| 172 - 185 | articulated object bottom part position, rotation, linear velocity, angle velocity                     |
| 185 - 187 | object dof position, velocity                                                                          |
| 187 - 257 | desired object motion trajectory $G = (g_t, g_{t+1}, \dots, g_{t+T})$                                  |
| 257 - 397 | sequence of 6-DoF wrist actions $(a_t^W, a_{t+1}^W, \dots, a_{t+T}^W)$ generated by high-level planner |
| 397 - 462 | right hand fingertip pose, linear velocity, angle velocity                                             |
| 462 - 527 | left hand fingertip pose, linear velocity, angle velocity                                              |

Table 5: Observation space of our framework in simulation.

object joint angle  $g_i^J$ .  $\lambda_1$ ,  $\lambda_2$  and  $\lambda_3$  is the hyperparameters to balance the weight of each component of the reward.

The reward function is defined as:

$$r_t = \exp^{-(\lambda_1 * \|g_t^R - \hat{g}_t^R\|_2 + \lambda_2 * \|g_t^T - \hat{g}_t^T\|_2 + \lambda_3 * \|g_t^J - \hat{g}_t^J\|_2)} \quad (1)$$

where  $\lambda_1 = 20$ ,  $\lambda_2 = 1$ , and  $\lambda_3 = 5$ .

We use an exponential map in the reward function, which is an effective reward shaping technique used in the case to minimize the distance, introduced by [68, 69]. To improve the calculation efficiency, we use quaternion to represent the object orientation. The angular position difference is then computed through the dot product between the normalized goal quaternion and the current object’s quaternion.

## C Detail Implementation in Real-World

### C.1 Perception

Our perception setup is shown in Figure 6. We arranged 4 identical Femto Bolt cameras around the table and face towards the object. We use FoundationPose [67] to estimate the articulated object pose. To remove the abnormal results, we compare each pose to the desired pose and remove the pose if the

error is smaller than a threshold (5 centimeters in translation and 0.5 radians in orientation). Finally, we average the rest of the poses as our observation for the policy. If none of the poses is smaller than the threshold, we continue to use the pose from the previous frame.

## C.2 Policy Distillation

We use the DAgger [70] algorithm for policy distillation. Table.6 gives the specific information of the observation space of the distilled policy.

| Index     | Description                                                                                            |
|-----------|--------------------------------------------------------------------------------------------------------|
| 0 - 24    | right hand dof position                                                                                |
| 24 - 48   | left hand dof position                                                                                 |
| 48 - 55   | right hand end-effector position, rotation                                                             |
| 55 - 62   | left hand end-effector position, rotation                                                              |
| 62 - 69   | articulated object top part position, rotation                                                         |
| 69 - 76   | articulated object bottom part position, rotation                                                      |
| 76 - 77   | object dof position                                                                                    |
| 77 - 147  | desired object motion trajectory $G = (g_t, g_{t+1}, \dots, g_{t+T})$                                  |
| 147 - 287 | sequence of 6-DoF wrist actions $(a_t^W, a_{t+1}^W, \dots, a_{t+T}^W)$ generated by high-level planner |

Table 6: Observation space of our framework in the real-world.

## D Hyperparameters of the PPO

Table.7 gives the hyperparameters of the PPO.

| Hyperparameters          | Value                  |
|--------------------------|------------------------|
| Num mini-batches         | 4                      |
| Num opt-epochs           | 5                      |
| Num episode-length       | 8                      |
| Hidden size              | [1024, 1024, 512, 256] |
| Clip range               | 0.2                    |
| Max grad norm            | 1                      |
| Learning rate            | 3.e-4                  |
| Discount ( $\gamma$ )    | 0.998                  |
| GAE lambda ( $\lambda$ ) | 0.95                   |
| Init noise std           | 0.8                    |
| Desired kl               | 0.02                   |
| Ent-coef                 | 0                      |

Table 7: Hyperparameters of PPO.

## E Domain Randomization

Isaac Gym provides lots of domain randomization functions for RL training. We add the randomization for all the tasks as shown in Table. 8 for each environment. we generate new randomization every 1000 simulation steps.

| Parameter                 | Type     | Distribution | Initial Range |
|---------------------------|----------|--------------|---------------|
| <b>Robot</b>              |          |              |               |
| Mass                      | Scaling  | uniform      | [0.5, 1.5]    |
| Friction                  | Scaling  | uniform      | [0.7, 1.3]    |
| Joint Lower Limit         | Scaling  | loguniform   | [0.0, 0.01]   |
| Joint Upper Limit         | Scaling  | loguniform   | [0.0, 0.01]   |
| Joint Stiffness           | Scaling  | loguniform   | [0.0, 0.01]   |
| Joint Damping             | Scaling  | loguniform   | [0.0, 0.01]   |
| <b>Object</b>             |          |              |               |
| Mass                      | Scaling  | uniform      | [0.5, 1.5]    |
| Friction                  | Scaling  | uniform      | [0.5, 1.5]    |
| Scale                     | Scaling  | uniform      | [0.95, 1.05]  |
| Position Noise            | Additive | gaussian     | [0.0, 0.02]   |
| Rotation Noise            | Additive | gaussian     | [0.0, 0.2]    |
| <b>Observation</b>        |          |              |               |
| Obs Correlated. Noise     | Additive | gaussian     | [0.0, 0.001]  |
| Obs Uncorrelated. Noise   | Additive | gaussian     | [0.0, 0.002]  |
| <b>Action</b>             |          |              |               |
| Action Correlated Noise   | Additive | gaussian     | [0.0, 0.015]  |
| Action Uncorrelated Noise | Additive | gaussian     | [0.0, 0.05]   |
| <b>Environment</b>        |          |              |               |
| Gravity                   | Additive | normal       | [0, 0.4]      |

Table 8: Domain randomization of all the tasks.
